# Supplementary material for: Molecular cloning and functional characterization of the sex-determination gene doublesex in the sexually dimorphic broad-horned beetle Gnatocerus cornutus (Coleoptera, Tenebrionidae)
Source: PubMed Central journal article supplement (PMC4941388; doi:10.1038/srep29337), 2016-07-11
Supplement: srep29337-s1.pdf [file srep29337-s1.pdf]

Supplementary Information

**Molecular cloning and functional characterization of the sex-determination gene *doublesex* in the sexually dimorphic broad-horned beetle *Gnatocerus cornutus* (Coleoptera, Tenebrionidae)**

Hiroki Gotoh<sup>1\*\*</sup>, Mai Ishiguro<sup>1\*\*</sup>, Hideto Nishikawa<sup>1</sup>, Shinichi Morita<sup>2</sup>, Kensuke Okada<sup>3</sup>, Takahisa Miyatake<sup>3</sup>, Toshinobu Yaginuma<sup>1</sup> and Teruyuki Niimi<sup>1, 2, 4\*</sup>

1. *Graduate School of Bioagricultural Sciences, Nagoya University, Chikusa, Nagoya 464-8601, Japan*

2. *Division of Evolutionary Developmental Biology, National Institute for Basic Biology, 38, Nishigonaka, Myodaiji, Okazaki 444-8585, Japan*

3. *Graduate School of Environmental and Life Science, Okayama University, Okayama 700-8530, Japan*

4. *Department of Basic Biology, School of Life Science, SOKENDAI (The Graduate University for Advanced Studies), 38 Nishigonaka, Myodaiji, Okazaki 444-8585, Japan*

\*Corresponding author. Division of Evolutionary Developmental Biology, National Institute for Basic Biology, 38, Nishigonaka, Myodaiji, Okazaki 444-8585, Japan. Tel.: +81-564-55-7606; fax: +81-564-55-7607.

E-mail address: niimi@nibb.ac.jp (T. Niimi).

\*\* Contributed equally

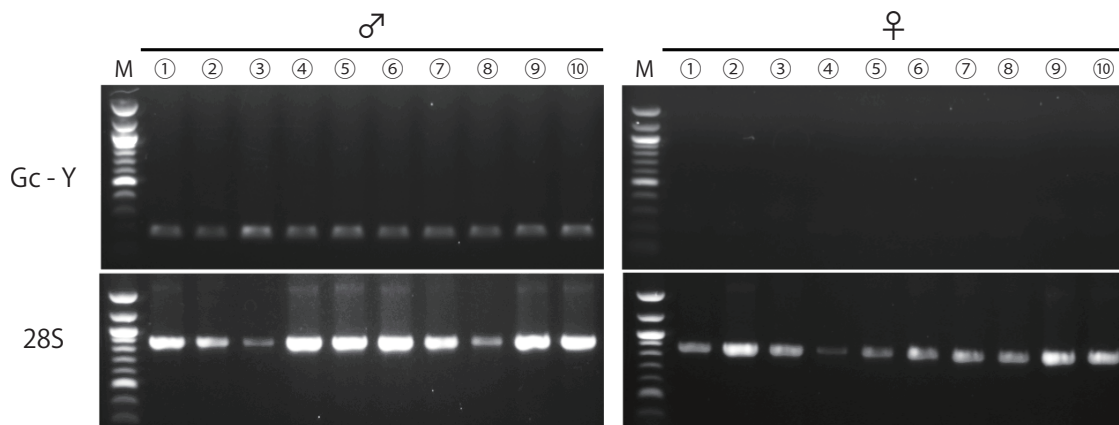

**Supplementary Figure 1S. PCR-based sexing of *G. cornutus***

PCR amplification patterns of genomic DNA from ten males (left panels) and ten females (right panels) using newly developed primer pair Gc-Y. 28S rRNA gene sequence was used as positive control. M indicates 100 bp DNA ladder size marker.
